# Supplementary material for: Exome sequencing reveals genetic differentiation due to high-altitude adaptation in the Tibetan cashmere goat (Capra hircus)
Source: PubMed Central journal article supplement (PMC4758086; doi:10.1186/s12864-016-2449-0), 2016-02-18

Figure S1

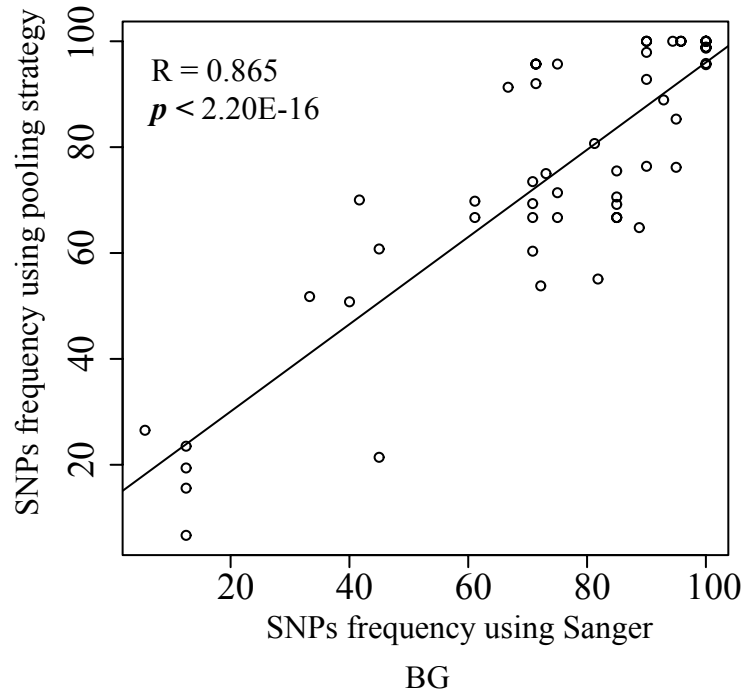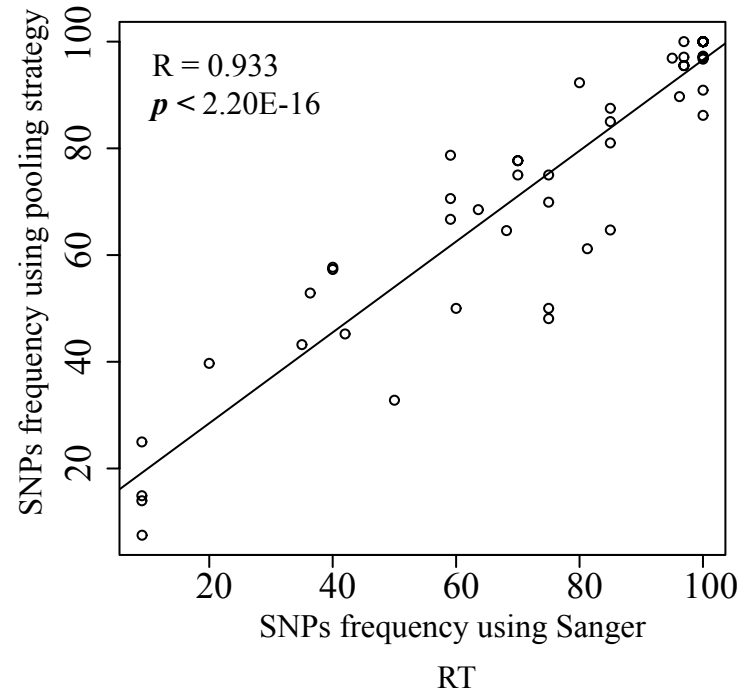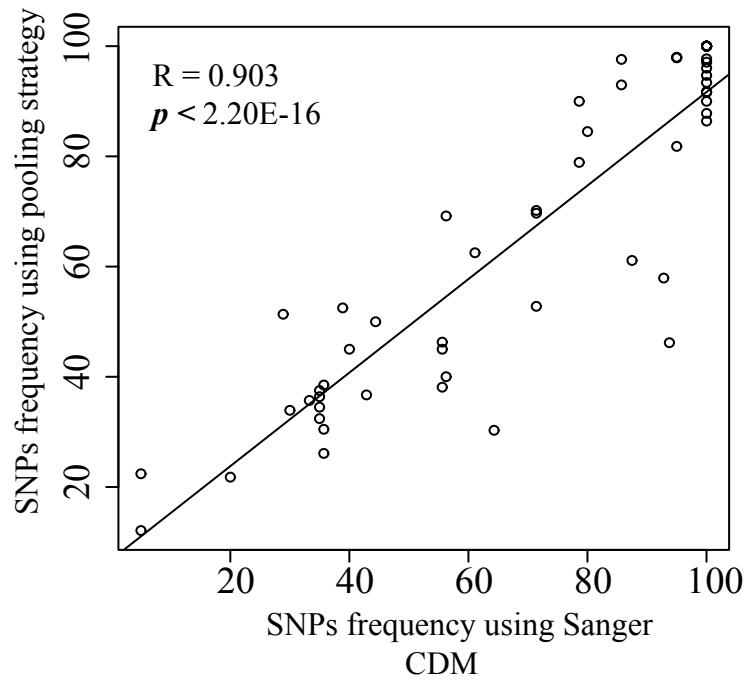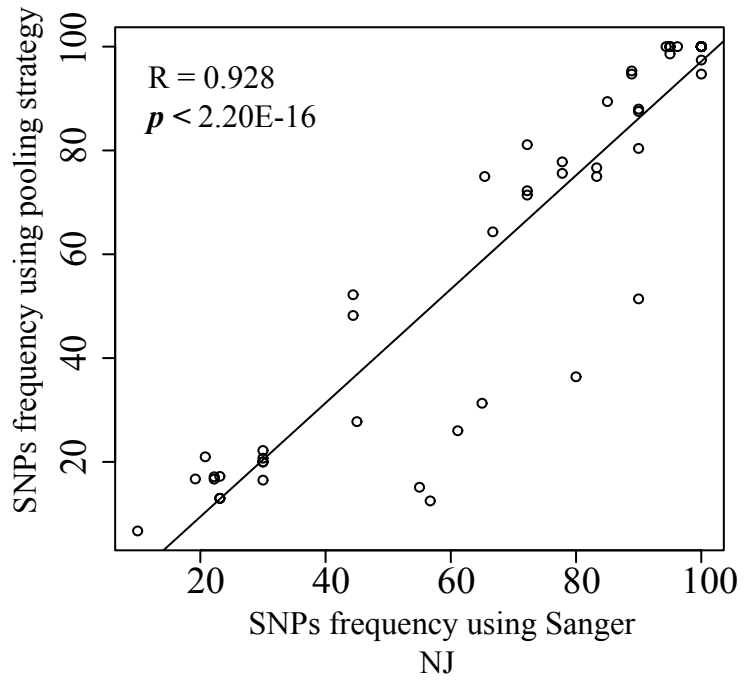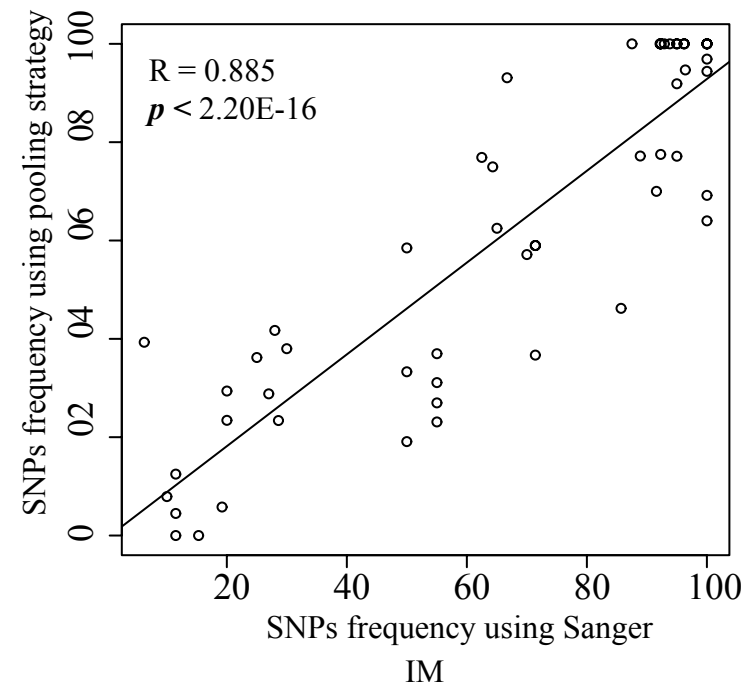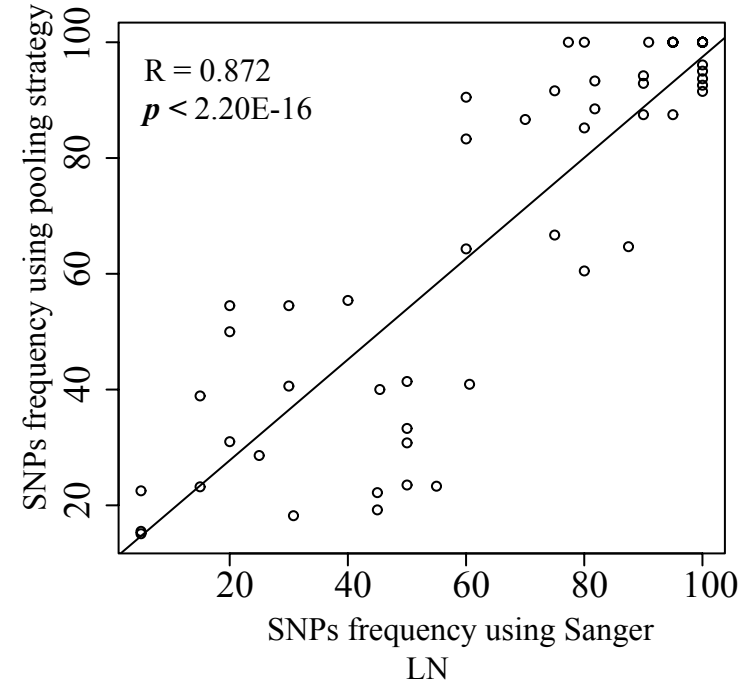

Supplement: 12864_2016_2449_MOESM2_ESM.pdf [file 12864_2016_2449_MOESM2_ESM.pdf]
