# Supplementary material for: Exome sequencing reveals genetic differentiation due to high-altitude adaptation in the Tibetan cashmere goat (Capra hircus)
Source: PubMed Central journal article supplement (PMC4758086; doi:10.1186/s12864-016-2449-0), 2016-02-18
Supplement: 12864_2016_2449_MOESM8_ESM.pdf [file 12864_2016_2449_MOESM8_ESM.pdf]

**Figure S3**

**NPC1L1**

|              |               |            |     |
|--------------|---------------|------------|-----|
|              | 226           | 232        | 242 |
| Tibetan goat | PS---QAEGR    | VIQPLNDEVV |     |
| Goat         | ..---.....S   | .....      |     |
| Sheep        | ..---.....S   | .....      |     |
| Cattle       | ..---.....ST  | .....      |     |
| Pig          | ..---..A.S    | .....G...  |     |
| Human        | .G---..V.SG   | .....EG.A  |     |
| Elephant     | ..---..P.NG   | ..L..S.I.  |     |
| Mouse        | .G---..LADGMK | ..DGKIT    |     |
| Opossum      | .G---.VL.NGLE | ..DV.TW    |     |
| Xenopus      | SN---TEI.HG   | .V.HYSRVW  |     |
| Zebrafish    | D.E-TSEVPAGAF | AFAGQAL    |     |
| Lamprey      | DGETAPQ.SQGM  | RQF..TTF   |     |
| Stickleback  | EGQ-TEGLPKGVI | .Y.GRAL    |     |

**NES**

|              |               |             |     |
|--------------|---------------|-------------|-----|
|              | 897           | 907         | 917 |
| Tibetan goat | QSLEEADKGS    | IRHLEEEEIVE |     |
| Goat         | .....R        | .....       |     |
| Sheep        | .....A.....R  | .....L.     |     |
| Cattle       | .....L.....D. |             |     |
| Pig          | R.P..EG.E.Q   | YL.A..N..   |     |
| Human        | R.P..V..E.Q   | NL....NLG   |     |
| Dog          | R...KENQEPV   | SLV.D----   |     |
| Elephant     | K.S..V..E.Q   | YL...GNL.   |     |
| Mouse        | E.PGGVE-D     | QQCL.V..GP. |     |
| Opossum      | ENQ.IPE---    | ---.GKGAL.  |     |
| Chicken      | EVHGDQQEEHG   | DLQ.GNGDIQ  |     |
| Xenopus      | EEQSNSETEDN   | IGL.Q.CDL.  |     |

**PTPRJ**

|              |              |        |      |            |            |            |          |            |            |
|--------------|--------------|--------|------|------------|------------|------------|----------|------------|------------|
|              | 137          | 143    | 148  | 170        | 182        | 187        | 283      | 288        | 292        |
| Tibetan goat | DLKLGSR      | RYTITL | ---- | AGNTDSLPG  | ---        | GPATRGSKYR |          | TDSFNFTVNE |            |
| Goat         | .....Q       | .....  | ---- | S          | .....      | ---        | P        | .....      | L          |
| Sheep        | ...M..H..V   | ..     | ---- | .....      | ---        | TP         | .....    | L          | .....      |
| Pig          | ...P.I..KV   | ..     | ---- | N          | .....      | SQPLRS     | GVP      | GY         | .....      |
| Human        | G..P.VQ.N    | NP     | ---- | .....      | ERSRAG     | --S        | TAPVHDES |            | ...S.LN.S. |
| Dog          | G.IP.T.NKF   | ..     | ---- | NS         | .E.SSQSTT  | .TDSV      | .QSD     |            | .G.L.LS..T |
| Elephant     | V..P.TQ.WF   | ..     | ---- | N          | .ERS..E--  | K.PQ       | ----     | N          | .R...L.A.V |
| Mouse        | G..P.TNNSFAF |        | ---- | NG         | .KRI.VT--- | NLSQLH     | .NS      |            | .H.V.Q...K |
| Opossum      | IWH..VCQA    | .IY    | ---- | SMVD       | ...AA-FD   | .STSTH     | .CN      |            | GH..DQNS.V |
| Zebra finch  | G.IP.TP.NF   | .V     |      | AETIGVTSVT | .KWGVDDS   | .SDSYL     | ..       |            | -----      |
| Anole lizard | N.NP.TS..FRV |        |      | AENISNT    | .VT.KWDRND | .DASNYT    | .Q       |            | SA.WSEFS.N |
| Chicken      | G.IP.TL.SFKV |        |      | AEYVGVTSVN | .TWTVN     | .T.LTAYT   | ..       |            | SSIN.K.SDI |
| Turkey       | G.MP.TL.SFKV |        |      | -----      | -----      | -----      | -----    |            | LSIN.E.SDI |

**PTPRZ1**

|              |              |         |      |
|--------------|--------------|---------|------|
|              | 1134         | 1143    | 1149 |
| Tibetan goat | QSSHAVSQAS   | SGDTSLK |      |
| Goat         | .....F       | .....   |      |
| Sheep        | .....F       | .....   |      |
| Cattle       | .....F       | .....   |      |
| Pig          | ....T....F   | .....   |      |
| Dog          | .V...LAPGGRR | PAT     |      |
| Elephant     | .PT.....TF   | ...L..  |      |
| Mouse        | .PT.TA....   | ...W..  |      |
| Opossum      | .PL..T.P.F   | ...L..  |      |
| Zebra finch  | .PL.VT.P..D  | ..L.R   |      |
| Anole lizard | .PL.VTTP.FD  | ..L..   |      |
| Turkey       | .PL.VTTP.FD  | ..L..   |      |
| Xenopus      | KQINTLPTT    | SAN.S.T |      |

**EDNRA**

|              |           |           |       |
|--------------|-----------|-----------|-------|
|              | 120       | 129       | 138   |
| Tibetan goat | ASLALGDLI | HVVIDL    | PINV  |
| Goat         | .....Y    | .....     |       |
| Sheep        | .....Y    | .....     |       |
| Cattle       | .....Y    | .....     |       |
| Human        | .....Y    | .....     |       |
| Dog          | .....Y    | .....     |       |
| Elephant     | .....Y    | .....     |       |
| Mouse        | .....Y    | .....     |       |
| Opossum      | .....Y    | I..I      | ..... |
| Zebra finch  | .....Y    | I..I..I   | ..... |
| Anole lizard | ...M....Y | II..I.... |       |
| Chicken      | .....Y    | I..I..I   | ..... |
| Turkey       | .....Y    | I..I..I   | ..... |
| Xenopus      | .....Y    | I..I..I   | ..... |

**FUT1**

|              |         |         |     |
|--------------|---------|---------|-----|
|              | 145     | 151     | 158 |
| Tibetan goat | ELHDWML | EEYAHVK |     |
| Goat         | .....S  | .....   |     |
| Sheep        | .....S  | .....L. |     |
| Cattle       | .....S  | .....L. |     |
| Pig          | .....S  | D...L.  |     |
| Human        | Q.....S | ...DLR  |     |
| Elephant     | K.....S | ...L.   |     |
| Mouse        | V.....S | ...S.LE |     |
| Opossum      | P.R...A | ...QLG  |     |

**PASK**

|              |            |            |      |
|--------------|------------|------------|------|
|              | 1317       | 1327       | 1336 |
| Tibetan goat | SDVHVNELLS | IQPGTHPQQM |      |
| Goat         | .....T     | .....      |      |
| Sheep        | .....      | .....      |      |
| Cattle       | .....      | .....      |      |
| Pig          | ....AH...R | L....R...L |      |
| Human        | .NA.I....V | RR.ASL..L  |      |
| Elephant     | ..A.IR.... | ...RPT...L |      |
| Mouse        | AEA.IHS.F  | I..SV....L |      |
